# Supplementary material
Source: PubMed Central journal article supplement (PMC4976031)
Supplement: NIHMS796559-supplement-1.pdf [file NIHMS796559-supplement-1.pdf]

*Supplemental Data for:*

## **Biophysical and biochemical characterization of avian secretory component provides structural insights into the evolution of the polymeric Ig receptor**

*Running title: Biophysical characterization of avian secretory component*

Beth M. Stadtmueller<sup>\*</sup>, Zhongyu Yang<sup>†,§</sup>, Kathryn E. Huey-Tubman<sup>\*</sup>, Helena Roberts-Mataric<sup>\*,‡</sup>, Wayne L. Hubbell<sup>†</sup>, and Pamela J. Bjorkman<sup>\*</sup>

<sup>\*</sup>Division of Biology and Biological Engineering, California Institute of Technology, Pasadena, CA 91125 USA

<sup>†</sup>Jules Stein Eye Institute and Department of Chemistry and Biochemistry, University of California, Los Angeles, CA 90095 USA

<sup>‡</sup>South Pasadena High School, South Pasadena, CA 91030 USA

<sup>§</sup>Present address: Department of Chemistry and Biochemistry, North Dakota State University, Fargo, ND 58108 USA

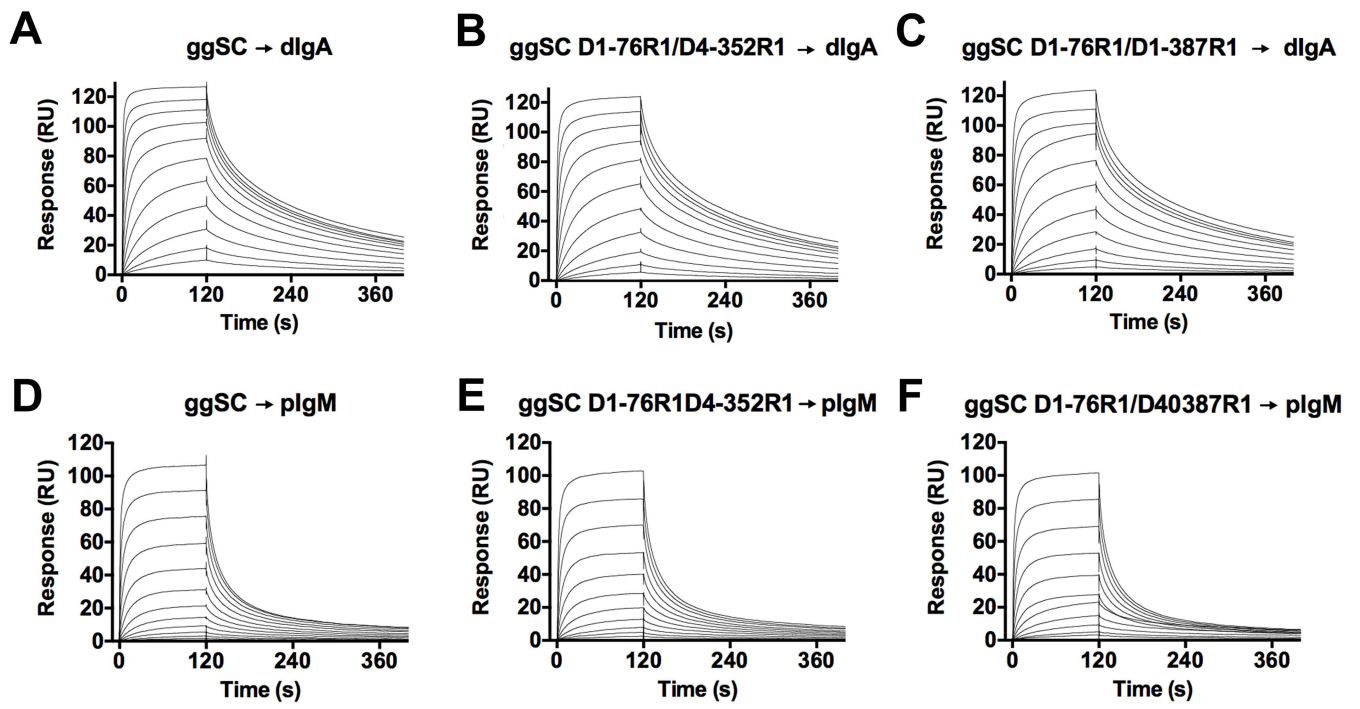

**Figure S1. Spin-labeled ggSC binding to human dIgA and pIgM.** Sensorgrams showing ggSC and nitroxide-labeled ggSC binding to dIgA (A-C) and pIgM (D-F). High concentrations shown are 1024uM and 512uM for dIgA and pIgM, respectively.

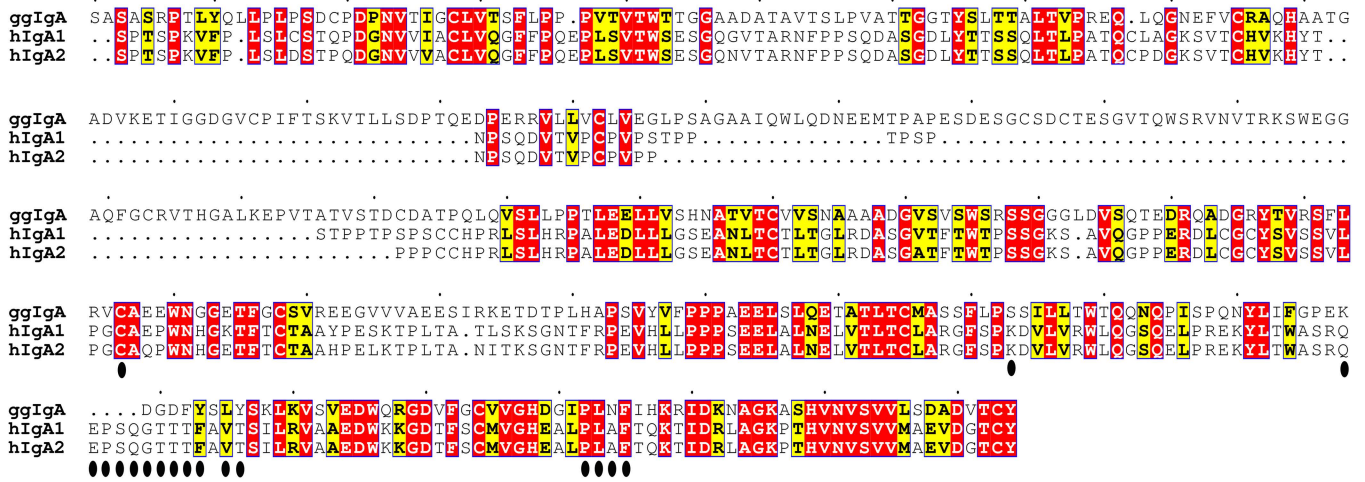

**Figure S2. Human and avian IgA sequences.** Sequence alignment of the IgA heavy chain constant regions from birds (ggIgA) and humans (hIgA1 and hIgA2). Residues implicated in mammalian SC binding to pIgA (1) are indicated by black ovals.

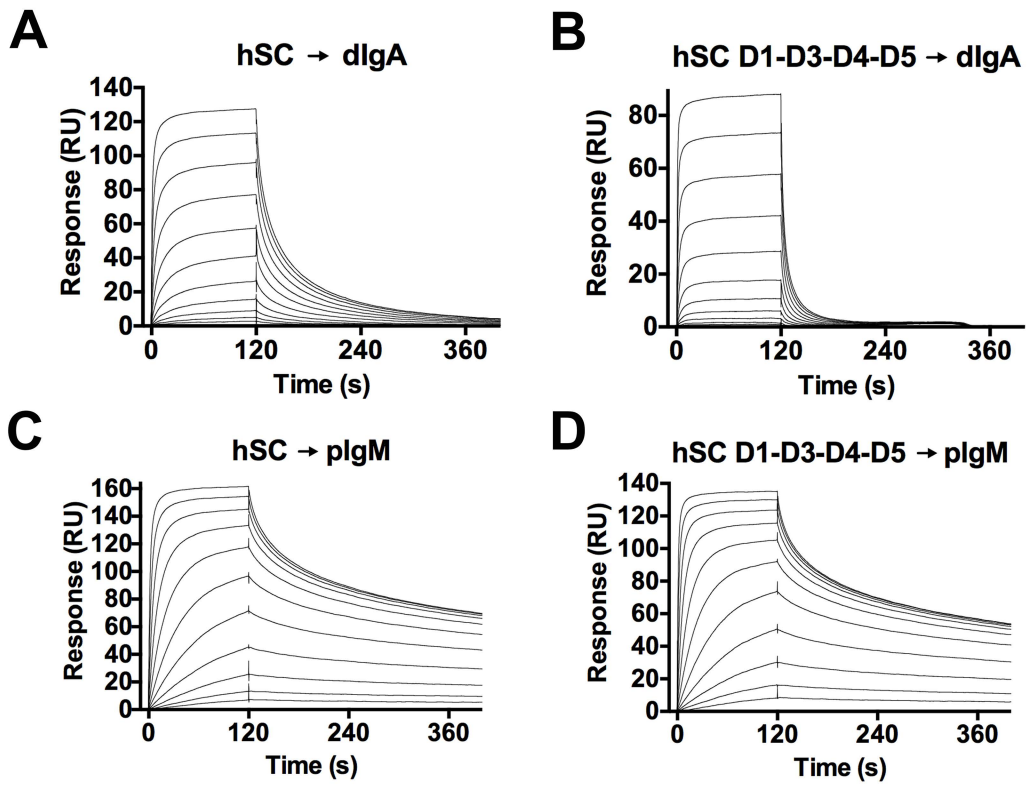

**Figure S3. hSC and hSC D1-D3-D4-D5 binding to human dIgA and pIgM.** (A-D) Sensorgrams showing the response (RU) of hSC and hSC D1-D3-D4-D5 binding to human dIgA and pIgM. High concentrations shown are 1024uM and 512uM for dIgA and pIgM, respectively.

## SUPPLEMENTAL REFERENCES

1. Woof, J. M., and Russell, M. W. (2011) Structure and function relationships in IgA. *Mucosal Immunol* **4**, 590-597.
